# Supplementary material
Source: PubMed Central journal article supplement (PMC374330)
Supplement: pnas_101_11_3833__3.pdf [file pnas_101_11_3833__3.pdf]

**Table 2:** Proteins identified in CCV preparations

| No                        | Protein name<br>Gel band number, range                                | Molecular mass<br>kDa | Specific Peptides                      |                                        |                                        | Shared Peptides    |          |          | Reference<br>GI Number |         |        |         |         |
|---------------------------|-----------------------------------------------------------------------|-----------------------|----------------------------------------|----------------------------------------|----------------------------------------|--------------------|----------|----------|------------------------|---------|--------|---------|---------|
|                           |                                                                       |                       | Total<br>Prep. A<br>Prep. B<br>Prep. C | Total<br>Prep. A<br>Prep. B<br>Prep. C | Total<br>Prep. A<br>Prep. B<br>Prep. C | Validated (Fig. 3) |          |          |                        |         |        |         |         |
| <b>coat proteins (18)</b> |                                                                       |                       |                                        |                                        |                                        |                    |          |          |                        |         |        |         |         |
| 1                         | clathrin heavy chain<br>49,2-61<br>50,13-62<br>48,15-61               | 193.1                 | 1460<br>398<br>550<br>512              | 0<br>0<br>0<br>0                       | 0<br>0<br>0<br>0                       | Y                  |          |          |                        |         |        |         |         |
| 2                         | clathrin light chain A1 or A2 or A3<br>24,9-25<br>23,9-24<br>20,19-23 | 25.6                  | 74<br>28<br>20<br>26                   | 0<br>0<br>0<br>0                       | 0<br>0<br>0<br>0                       | Y                  | 203276   | 14010873 | 71562                  | 203278  | 116500 | 4502899 |         |
| 3                         | clathrin light chain B1 or B2<br>22,6-23<br>21,7-26<br>21,14-23       | 25.2                  | 131<br>54<br>44<br>33                  | 0<br>0<br>0<br>0                       | 0<br>0<br>0<br>0                       | Y                  | 116507   | 514      | 71563                  | 4502901 | 203361 | 116504  | 6005995 |
| 4                         | AP1 beta 1<br>46,40-47<br>45,37-47<br>43,40-55                        | 105.4                 | 64<br>15<br>26<br>23                   | 90<br>14<br>43<br>33                   | 0<br>0<br>0<br>0                       | a                  | 8392872  | 6671553  | 4501973                |         |        |         |         |
| 5                         | AP1 gamma<br>43<br>42/43,40-43<br>39,38-39                            | 92.1                  | 27<br>2<br>9<br>16                     | 0<br>0<br>0<br>0                       | 0<br>0<br>0<br>0                       | Y                  | 6753070  | 12643391 | 4501979                |         |        |         |         |
| 6                         | AP1 mu 1<br>30,30-31<br>29,27-30<br>27,27-28                          | 48.7                  | 48<br>17<br>18<br>13                   | 0<br>0<br>0<br>0                       | 0<br>0<br>0<br>0                       |                    | 14210504 | 6671557  |                        |         |        |         |         |
| 7                         | AP1 sigma 1<br>7,6-7<br>8/9/13,8-13<br>9/11,9-11                      | 18.8                  | 15<br>3<br>7<br>5                      | 0<br>0<br>0<br>0                       | 0<br>0<br>0<br>0                       |                    | 4557471  | 5630084  |                        |         |        |         |         |
| 8                         | AP2 alpha 1<br>46,37-58<br>45,25-58<br>42,37-44                       | 108.7                 | 150<br>41<br>69<br>40                  | 32<br>3<br>14<br>15                    | 0<br>0<br>0<br>0                       | b                  | 6671561  | 14786902 | 12585138               |         |        |         |         |
| 9                         | AP2 alpha C<br>43,37-58<br>43,37-58<br>39,17-54                       | 104.9                 | 169<br>35<br>60<br>74                  | 32<br>3<br>14<br>15                    | 0<br>0<br>0<br>0                       | b                  | 13591908 | 90292    |                        |         |        |         |         |
| 10                        | AP2 beta 2<br>44,14-56<br>43,15-47<br>40,36-55                        | 105.5                 | 208<br>61<br>86<br>61                  | 90<br>14<br>43<br>33                   | 0<br>0<br>0<br>0                       | a                  | 4557469  | 14785749 | 12836566               |         |        |         |         |
| 11                        | AP2 mu 1<br>32,29-34<br>31,28-35<br>28,25-31                          | 49.9                  | 199<br>67<br>54<br>78                  | 0<br>0<br>0<br>0                       | 0<br>0<br>0<br>0                       |                    | 6753074  | 7448828  |                        |         |        |         |         |
| 12                        | AP2 sigma 2 or 1<br>2,2-12<br>4/5,4-5<br>11,9-16                      | 17.1                  | 33<br>21<br>2<br>10                    | 0<br>0<br>0<br>0                       | 0<br>0<br>0<br>0                       |                    | 4757996  | 11038643 | 13654962               |         |        |         |         |
| 13                        | AP180<br>52,23-55                                                     | 91.5                  | 97<br>18                               | 16<br>3                                | 0<br>0                                 | c                  | 13994177 | 486929   | 7662228                | 7305507 | 193209 |         |         |

|                               |                                                                         |       |                      |                   |   |  |  |   |                                                                                                         |
|-------------------------------|-------------------------------------------------------------------------|-------|----------------------|-------------------|---|--|--|---|---------------------------------------------------------------------------------------------------------|
|                               | 23/34,18-60<br>48,25-53                                                 |       | 44<br>35             | 9<br>4            |   |  |  |   |                                                                                                         |
| 14                            | auxilin (DNAj)<br>46,5-47<br>41/44,37-59<br>41,38-44                    | 100.2 | 86<br>20<br>45<br>21 | 0<br>0<br>0<br>0  |   |  |  |   | Brodsky FM. et al. Annu Rev Cell Dev Biol.17:517-68. (2001)<br>7662146 2498170 13278253                 |
| 15                            | CALM<br>39,29-55<br>38/39,18-59<br>35,33-43                             | 69.5  | 56<br>15<br>13<br>28 | 16<br>3<br>9<br>4 | c |  |  |   | Brodsky FM. et al. Annu Rev Cell Dev Biol.17:517-68. (2001)<br>2792502 2792500 16758324                 |
| 16                            | cyclin G-associated kinase<br>60,47-62<br>48,47-49                      | 145   | 18<br>ND<br>8<br>10  | 0<br>ND<br>0<br>0 |   |  |  |   | Brodsky FM. et al. Annu Rev Cell Dev Biol.17:517-68. (2001)<br>13591947 17375734 4885251                |
| 17                            | Hsc70<br>39<br>38,38-39<br>36,35-36                                     | 71.1  | 45<br>12<br>17<br>16 | 0<br>0<br>0<br>0  |   |  |  |   | Brodsky FM. et al. Annu Rev Cell Dev Biol.17:517-68. (2001)<br>13242237 347019 123647 5729877           |
| 18                            | huntingtin interacting protein 12 (HIP1R)<br>47<br>46,41-46<br>44,43-44 | 127.2 | 51<br>9<br>10<br>32  | 0<br>0<br>0<br>0  |   |  |  | Y | Brodsky FM. et al. Annu Rev Cell Dev Biol.17:517-68. (2001)<br>12718814 13431575 12852463               |
| <b>accessory proteins (1)</b> |                                                                         |       |                      |                   |   |  |  |   |                                                                                                         |
| 19                            | epsin<br>40/42,40-42<br>41<br>37/38,37-38                               | 60.2  | 6<br>2<br>2<br>2     | 0<br>0<br>0<br>0  |   |  |  | Y | Slepnev VI. & De Camilli P. Nat. Rev. Neurosci. 1:161-172 (2000)<br>3249559 16923990                    |
| <b>synaptic vesicles (32)</b> |                                                                         |       |                      |                   |   |  |  |   |                                                                                                         |
| 20                            | cysteine string protein<br>18<br>19,18-19                               | 22.8  | 4<br>ND<br>1<br>3    | 0<br>ND<br>0<br>0 |   |  |  |   | Evans GJ. & Morgan A. Biochem J. 364:343-7. (2002)<br>12643505 7512369 7949027 18591697 1232165         |
| 21                            | Rab3A<br>15<br>15,14-15<br>14,14-15                                     | 25.2  | 17<br>4<br>5<br>8    | 2<br>1<br>1<br>0  | d |  |  |   | Schluter OM. et al. J Biol Chem. 277:40919-40929. (2002)<br>6679593 7689363 129323 89582 4506367        |
| 22                            | Rab3C<br>16<br>14                                                       | 26.1  | 4<br>ND<br>3<br>1    | 0<br>ND<br>0<br>0 |   |  |  |   | Schluter OM. et al. J Biol Chem. 277:40919-40929. (2002)<br>13470090 6174943 1045640                    |
| 23                            | SCAMP-1<br>20/21,20-21<br>19/20,19-20<br>20                             | 38.3  | 14<br>4<br>8<br>2    | 0<br>0<br>0<br>0  |   |  |  |   | Fernandez-Chacon R. & Sudhof TC. J Neurosci. 20:7941-50. (2000)<br>3914958 3395572                      |
| 24                            | SCAMP-5<br>10/12/13/14,10-14<br>13<br>13                                | 26.4  | 6<br>4<br>1<br>1     | 0<br>0<br>0<br>0  |   |  |  |   | Fernandez-Chacon R. & Sudhof TC. J Neurosci. 20:7941-50. (2000)<br>13929020 9937988                     |
| 25                            | synaptic vesicle protein 2 (SV2)<br>43,42-43<br>42,41-45<br>39,38-40    | 83.3  | 33<br>3<br>20<br>10  | 0<br>0<br>0<br>0  |   |  |  |   | Xu T. & Bajjalieh SM. Nat Cell Biol. 3:691-8. (2001)<br>285432 17105366 11528518                        |
| 26                            | synaptic vesicle protein 2 form B (SV2B)<br>42,39-42<br>41,39-42<br>37  | 78.2  | 21<br>7<br>13<br>1   | 0<br>0<br>0<br>0  |   |  |  |   | Janz R. et al. Neuron. 24:1003-16. (1999)<br>17105360 420291                                            |
| 27                            | synaptogyrin 1<br>7/17/18,6-18<br>8/16/17/18,8-18<br>16/17,16-17        | 25.9  | 19<br>7<br>10<br>2   | 0<br>0<br>0<br>0  |   |  |  |   | Janz R. et al. Neuron. 24:687-700. (1999)<br>1587032 12833341 9507167 14779004 4759200 6678193 11418146 |

|    |                                                                               |      |                      |                   |                                                                                                                     |  |  |   |
|----|-------------------------------------------------------------------------------|------|----------------------|-------------------|---------------------------------------------------------------------------------------------------------------------|--|--|---|
| 28 | synaptogyrin 3<br>7<br>8/15,8-15                                              | 24.7 | 3<br>1<br>2<br>ND    | 0<br>0<br>0<br>ND | Hubner K. et al. Int Rev Cytol. 214:103-59. (2002)<br>6631112 6755708                                               |  |  |   |
| 29 | synaptophysin<br>24/25,23-27<br>18/23/25,18-26<br>23,22-24                    | 33.6 | 41<br>13<br>10<br>18 | 0<br>0<br>0<br>0  | Hubner K. et al. Int Rev Cytol. 214:103-59. (2002)<br>6981622 56823 6678195                                         |  |  | Y |
| 30 | synaptoporin<br>23<br>22,21-23                                                | 29.3 | 5<br>1<br>4<br>ND    | 0<br>0<br>0<br>ND | Hubner K. et al. Int Rev Cytol. 214:103-59. (2002)<br>135158 13027428                                               |  |  |   |
| 31 | synaptotagmin I<br>36,36-37<br>35/36,35-39<br>32,32-34                        | 47.9 | 52<br>8<br>15<br>29  | 15<br>2<br>6<br>7 | e O'Connor V. & Lee AG. Nat Neurosci. 5:823-4. (2002)<br>1351175 6678197 92791 226865 5032139                       |  |  | Y |
| 32 | synaptotagmin II<br>37<br>37,36-37<br>33,33-34                                | 47.7 | 16<br>3<br>3<br>10   | 15<br>2<br>6<br>7 | e O'Connor V. & Lee AG. Nat Neurosci. 5:823-4. (2002)<br>1083522 6981624                                            |  |  |   |
| 33 | synuclein alpha<br>6<br>8                                                     | 22.4 | 2<br>1<br>1<br>ND    | 0<br>0<br>0<br>ND | Leng Y. et al. J Biol Chem. 276:28212-8. (2001)<br>9507125 2829293 12852348 285435 6678047                          |  |  |   |
| 34 | vacuolar ATPase, subunit A (V1 sector)<br>39<br>38<br>36,35-37                | 68.6 | 39<br>5<br>6<br>28   | 0<br>0<br>0<br>0  | Morel N. et al. Journal of Neurochemistry 79:485-488. (2001)<br>6680752 108733 383059 401321                        |  |  |   |
| 35 | vacuolar ATPase, subunit a (Vo sector)<br>45/46,45-46<br>45,43-45<br>44,39-44 | 96.4 | 14<br>2<br>4<br>9    | 0<br>0<br>0<br>0  | Galli T. et al. J. Biol. Chem. 271:2193-2198. (1996)<br>13928826 12643433 4885085 7329154 12025532 12643966 3915315 |  |  |   |
| 36 | vacuolar ATPase, subunit B (V1 sector)<br>34,33-34<br>34,33-35<br>29,29-32    | 56.8 | 54<br>7<br>15<br>32  | 0<br>0<br>0<br>0  | Morel N. et al. J Neurochem 79:485-488. (2001)<br>12643430 549205 17105370 1184661                                  |  |  |   |
| 37 | vacuolar ATPase, subunit C (V1 sector)<br>26<br>24                            | 44.1 | 5<br>ND<br>2<br>9    | 0<br>ND<br>0<br>0 | Morel N. et al. J Neurochem 79:485-488. (2001)<br>13384916 12585525 16307356                                        |  |  |   |
| 38 | vacuolar ATPase, subunit D (V1 sector)<br>19<br>19<br>18,18-19                | 28.5 | 8<br>1<br>3<br>4     | 0<br>0<br>0<br>0  | Morel N. et al. J Neurochem 79:485-488. (2001)<br>12963799 5138993 7022231 7706757 731097 11999090                  |  |  |   |
| 39 | vacuolar ATPase, subunit d (Vo sector)<br>24,23-25<br>23,20-24<br>22,21-23    | 40.7 | 33<br>9<br>14<br>10  | 0<br>0<br>0<br>0  | Morel N. et al. J Neurochem 79:485-488. (2001)<br>12643287 7304909                                                  |  |  |   |
| 40 | vacuolar ATPase, subunit E (V1 sector)<br>19<br>19,18-19<br>19,18-19          | 26.2 | 22<br>6<br>10<br>6   | 0<br>0<br>0<br>0  | Morel N. et al. J Neurochem 79:485-488. (2001)<br>137473 313014 6680756 13097342 4502317 539608                     |  |  |   |
| 41 | vacuolar ATPase, subunit G (V1 sector)<br>2<br>4                              | 13.7 | 2<br>1<br>1<br>ND    | 0<br>0<br>0<br>ND | Morel N. et al. J Neurochem 79:485-488. (2001)<br>15617197 4757818 14735257                                         |  |  |   |
| 42 | vacuolar ATPase, subunit H (V1 sector)<br>31,30-31<br>30/32,30-32             | 56.4 | 14<br>3<br>2         | 0<br>0<br>0       | Morel N. et al. J Neurochem 79:485-488. (2001)<br>12643371 19527044 7706262 11640592                                |  |  |   |

|                                 |                                                                                             |      |                            |                         |                                                                                                                             |  |  |  |  |  |  |  |
|---------------------------------|---------------------------------------------------------------------------------------------|------|----------------------------|-------------------------|-----------------------------------------------------------------------------------------------------------------------------|--|--|--|--|--|--|--|
|                                 | <b>28,26-29</b>                                                                             |      | <b>9</b>                   | <b>0</b>                |                                                                                                                             |  |  |  |  |  |  |  |
| 43                              | vesicular inhibitory amino acid transporter<br>34/35,34-35<br>30/31/33/34,30-34<br>30,29-30 | 58.3 | <b>11</b><br>2<br>4<br>5   | <b>0</b><br>0<br>0<br>0 | Jellali A. et al. J Comp Neurol. 449:76-87. (2002)<br>13929106 6678569                                                      |  |  |  |  |  |  |  |
| 44                              | VGLUT1 (solute carrier family 17, member 7)<br>36<br>31/33,31-32<br>31,30-31                | 62.3 | <b>13</b><br>3<br>5<br>5   | <b>0</b><br>0<br>0<br>0 | Kaneko T. & Fujiyama F. Neurosci Res. 42:243-50. (2002)<br>16758726 9945322 2143624                                         |  |  |  |  |  |  |  |
| 45                              | VGLUT2<br>37<br>35<br>32,32-34                                                              | 65   | <b>7</b><br>1<br>1<br>5    | <b>0</b><br>0<br>0<br>0 | Kaneko T. & Fujiyama F. Neurosci Res. 42:243-50. (2002)<br>16758166 9966811 8515881 18252796                                |  |  |  |  |  |  |  |
|                                 | <i>SNARE apparatus</i>                                                                      |      |                            |                         |                                                                                                                             |  |  |  |  |  |  |  |
| 46                              | VAMP-1<br>6,5-7<br>9,3-9<br>10,10-11                                                        | 12.9 | <b>17</b><br>7<br>6<br>4   | <b>0</b><br>0<br>0<br>0 | Chen YA. & Scheller RH. Nat Rev Mol Cell Biol. 2:98-106. (2001)<br>2501080 6981612                                          |  |  |  |  |  |  |  |
|                                 |                                                                                             |      |                            |                         |                                                                                                                             |  |  |  |  |  |  |  |
| 47                              | VAMP-2<br>4,3-6<br>7,3-11<br>7/10,7-11                                                      | 14.5 | <b>34</b><br>16<br>8<br>10 | <b>0</b><br>0<br>0<br>0 | Chen YA. & Scheller RH. Nat Rev Mol Cell Biol. 2:98-106. (2001)<br>7657675 6678553 6678551 6729809 2253399 13653389 4894188 |  |  |  |  |  |  |  |
| 48                              | SNAP-25<br>16<br>15,15&56<br>16,15-16                                                       | 23.5 | <b>15</b><br>4<br>6<br>5   | <b>0</b><br>0<br>0<br>0 | Walch-Solimena C. et al. J Cell Biol. 128:637-45. (1995)<br>4507099 6755588 1314856                                         |  |  |  |  |  |  |  |
| 49                              | syntaxin 1A<br>20<br>20<br>19                                                               | 34.1 | <b>7</b><br>2<br>4<br>1    | <b>0</b><br>0<br>0<br>0 | Chen YA. & Scheller RH. Nat Rev Mol Cell Biol. 2:98-106. (2001)<br>417842 285304 4759182 7595847 7767102 207127 6665797     |  |  |  |  |  |  |  |
| 50                              | syntaxin 1B<br>20,20-21<br>20,20-21<br>20,19-20&53                                          | 33.4 | <b>16</b><br>4<br>7<br>5   | <b>0</b><br>0<br>0<br>0 | Chen YA. & Scheller RH. Nat Rev Mol Cell Biol. 2:98-106. (2001)<br>1174533 383088 6981600                                   |  |  |  |  |  |  |  |
| 51                              | Sec1 (munc-18)<br>38,37-38<br>37,36-38<br>34,34-35                                          | 67.9 | <b>64</b><br>9<br>23<br>32 | <b>0</b><br>0<br>0<br>0 | Garcia EP. et al. J Cell Biol. 129:105-20. (1995)<br>6981602 435430 3810884 2501510 17225417                                |  |  |  |  |  |  |  |
| <b>vesicle trafficking (29)</b> |                                                                                             |      |                            |                         |                                                                                                                             |  |  |  |  |  |  |  |
|                                 | <i>SNARE proteins</i>                                                                       |      |                            |                         |                                                                                                                             |  |  |  |  |  |  |  |
| 52                              | NSF<br>40<br>39<br>37                                                                       | 83.2 | <b>32</b><br>10<br>14<br>8 | <b>0</b><br>0<br>0<br>0 | McDonald PH. et al. J Biol Chem. 274:10677-80. (1999)<br>13489067                                                           |  |  |  |  |  |  |  |
| 53                              | SNAP alpha<br>20<br>20<br>19                                                                | 33.5 | <b>10</b><br>2<br>3<br>5   | <b>1</b><br>0<br>1<br>0 | f Hanley JG. et al. Neuron. 34:53-67. (2002)<br>6094309 18034791 13385392 2143586 12851441                                  |  |  |  |  |  |  |  |
| 54                              | SNAP beta<br>20/21,20-21<br>20,20-21<br>20                                                  | 34.2 | <b>9</b><br>2<br>4<br>3    | <b>1</b><br>0<br>1<br>0 | f Hanley JG. et al. Neuron. 34:53-67. (2002)<br>11414800 3024628 114980                                                     |  |  |  |  |  |  |  |
| 55                              | syntaxin 6<br>20<br>18<br>19/20,19-20                                                       | 29.1 | <b>7</b><br>1<br>2<br>4    | <b>0</b><br>0<br>0<br>0 | Chen YA. & Scheller RH. Nat Rev Mol Cell Biol. 2:98-106. (2001)<br>13928922 12844640 10946800                               |  |  |  |  |  |  |  |
| 56                              | syntaxin 13 or 12<br>22<br>23,22-23<br>21,20-21                                             | 30.5 | <b>8</b><br>2<br>3<br>3    | <b>0</b><br>0<br>0<br>0 | Chen YA. & Scheller RH. Nat Rev Mol Cell Biol. 2:98-106. (2001)<br>3184552 12621104 19527102                                |  |  |  |  |  |  |  |











|                          |                                                                                  |       |                      |                   |                                                                        |          |          |          |          |          |          |          |        |        |
|--------------------------|----------------------------------------------------------------------------------|-------|----------------------|-------------------|------------------------------------------------------------------------|----------|----------|----------|----------|----------|----------|----------|--------|--------|
| 115                      | enolase gamma<br>30<br>30,28-30<br>27,26-27                                      | 47.5  | 14<br>3<br>5<br>6    | 0<br>0<br>0<br>0  | 119349                                                                 | 26023949 |          |          |          |          |          |          |        |        |
| 116                      | pyruvate kinase<br>36<br>35<br>31,31-32                                          | 58.2  | 20<br>2<br>9<br>9    | 0<br>0<br>0<br>0  | 1346398                                                                | 16757994 | 2506796  | 1363219  | 6755074  | 125598   | 2117873  | 16741633 |        |        |
| 117                      | lactate dehydrogenase<br>23<br>20/22,20-22<br>21/22,21-22                        | 36.8  | 11<br>2<br>5<br>4    | 0<br>0<br>0<br>0  | 6981146                                                                | 6678674  | 4557032  | 13786847 |          |          |          |          |        |        |
| 118                      | aspartate transaminase<br>27<br>26<br>24                                         | 46.6  | 7<br>3<br>3<br>1     | 0<br>0<br>0<br>0  | 91997                                                                  | 345752   | 6980970  | 6754034  | 90313    |          |          |          |        |        |
| 119                      | creatine kinase B (brain form)<br>29,29-30<br>29,28-29<br>26,25-26               | 40.9  | 33<br>6<br>7<br>20   | 0<br>0<br>0<br>0  | 203476                                                                 | 125296   | 12852054 | 6978659  | 10946574 |          |          |          |        |        |
| 120                      | glutamine synthetase<br>28<br>25<br>25,24-26                                     | 42.9  | 8<br>1<br>1<br>6     | 0<br>0<br>0<br>0  | 121376                                                                 | 8393456  | 228136   |          |          |          |          |          |        |        |
| 121                      | malate dehydrogenase<br>21<br>21<br>20,20-21                                     | 36.6  | 9<br>2<br>3<br>4     | 0<br>0<br>0<br>0  | 6678918                                                                | 12837652 | 15100179 | 7431153  | 5174539  | 5107783  | 6226874  |          |        |        |
| 122                      | S-adenosylhomocysteine hydrolase-like 1<br>36<br>35<br>32,31-32                  | 67.9  | 10<br>2<br>1<br>7    | 0<br>0<br>0<br>0  | 5729724                                                                | 7435520  | 21361647 |          |          |          |          |          |        |        |
| 123                      | 2'-3'-cyclic-nucleotide 3'-phosphodiesterase<br>29<br>28/29/30,28-30<br>25,25-26 | 47.6  | 18<br>5<br>3<br>10   | 0<br>0<br>0<br>0  | 27689495                                                               | 2143555  | 116560   |          |          |          |          |          |        |        |
| <b>cytoskeleton (11)</b> |                                                                                  |       |                      |                   |                                                                        |          |          |          |          |          |          |          |        |        |
| 124                      | actin beta or gamma<br>28,28-29<br>28,26-28<br>25,24-26                          | 42.1  | 34<br>10<br>12<br>12 | 0<br>0<br>0<br>0  | Qualmann B. & Kessels MM. Int Rev Cytol. 220:93-144. (2002)<br>71625   | 4501887  | 13278939 | 71621    | 1351867  | 4501885  | 71620    | 2624850  | 576368 | 231506 |
| 125                      | ARP3 actin-related protein 3 homolog; ARP3<br>31<br>30                           | 47.8  | 2<br>1<br>1<br>ND    | 0<br>0<br>0<br>ND | Qualmann B. & Kessels MM. Int Rev Cytol. 220:93-144. (2002)<br>5031573 | 14745483 | 9966913  | 12835802 | 13542701 |          |          |          |        |        |
| 126                      | centractin alpha<br>29<br>25,25-26                                               | 42.7  | 5<br>2<br>ND<br>3    | 0<br>0<br>ND<br>0 | 5031569                                                                | 22122615 | 381964   | 12859778 |          |          |          |          |        |        |
| 127                      | Cofilin 1 non-muscle<br>7/8,7-8<br>8                                             | 18.7  | 5<br>4<br>1<br>ND    | 0<br>0<br>0<br>ND | 8393101                                                                | 6680924  | 116850   | 5031635  | 12861068 |          |          |          |        |        |
| 128                      | dynein cytoplasmic heavy chain 1<br>58<br>55,54-56                               | 534.4 | 13<br>2<br>ND<br>11  | 0<br>0<br>ND<br>0 | 9506549                                                                | 729378   | 23503061 | 13384736 |          |          |          |          |        |        |
| 129                      | ezrin (villin 2)<br>40                                                           | 67.8  | 4<br>ND<br>3         | 0<br>ND<br>0      | 6678571                                                                | 12832989 | 119717   | 340217   | 11276938 | 21614499 | 17902245 |          |        |        |



|     |                                                                                              |       |                      |                     |                                                  |          |          |          |          |          |         |         |        |
|-----|----------------------------------------------------------------------------------------------|-------|----------------------|---------------------|--------------------------------------------------|----------|----------|----------|----------|----------|---------|---------|--------|
| 144 | CD9 antigen<br>11<br>12                                                                      | 25.7  | 3<br>1<br>2<br>ND    | 0<br>0<br>0<br>ND   | 729088                                           |          |          |          |          |          |         |         |        |
| 145 | EAAT1 (GLAST1)<br>34,33-37<br>34,31-37<br>31/32,17-34                                        | 59.7  | 44<br>11<br>15<br>18 | 2<br>0<br>1<br>1    | j                                                | 1169457  | 5577964  | 9507115  | 232176   | 20141407 | 8118689 | 543221  |        |
| 146 | EAAT2 (Glt1)<br>36,34-41<br>37,32-57<br>34,30-37                                             | 62.6  | 84<br>18<br>30<br>36 | 0<br>0<br>0<br>0    | Y                                                | 10121878 | 705398   | 8394286  | 417074   | 1363971  | 1169460 | 2459554 |        |
| 147 | EAAT4<br>37<br>34,33-35                                                                      | 60.1  | 10<br>ND<br>1<br>9   | 2<br>ND<br>1<br>1   | j                                                | 4827012  | 14091748 | 6678003  |          |          |         |         |        |
| 148 | GAT-1 (GABA transporter)<br>38<br>33/34,33-34                                                | 67.6  | 3<br>ND<br>1<br>2    | 0<br>ND<br>0<br>0   |                                                  | 400622   | 1352530  | 13242269 | 4507039  | 639478   |         |         |        |
| 149 | GAT-3 (GABA transporter)<br>36/37,36-37<br>36,35-38<br>32/33/34/35,32-35                     | 71.3  | 11<br>2<br>5<br>4    | 0<br>0<br>0<br>0    |                                                  | 13242271 | 400625   |          |          |          |         |         |        |
| 150 | limbic system-associated membrane protein<br>36<br>31/32/33,31-33                            | 37.3  | 4<br>1<br>ND<br>3    | 0<br>0<br>ND<br>0   |                                                  | 25742796 | 4505025  |          |          |          |         |         |        |
| 151 | Na <sup>+</sup> /K <sup>+</sup> ATPase alpha 1<br>43<br>42,42-46<br>39                       | 114.2 | 10<br>1<br>3<br>6    | 30<br>4<br>8<br>18  | k Uriu T. et al. J Neurochem. 56:1548-56. (1991) | 358959   | 205632   | 6978543  | 16307541 | 21450277 |         |         |        |
| 152 | Na <sup>+</sup> /K <sup>+</sup> ATPase alpha 2<br>43,43-44<br>42,40-46<br>40,39-41           | 113.4 | 20<br>4<br>8<br>8    | 60<br>8<br>17<br>35 | k Uriu T. et al. J Neurochem. 56:1548-56. (1991) | 6978545  | 4502271  | 15488862 |          |          |         |         |        |
| 153 | Na <sup>+</sup> /K <sup>+</sup> ATPase alpha 3<br>44,43-44<br>42,40-46<br>39,38-44           | 113   | 50<br>5<br>14<br>31  | 61<br>8<br>17<br>36 | k Uriu T. et al. J Neurochem. 56:1548-56. (1991) | 6978547  | 55770    | 358960   | 19855078 |          |         |         |        |
| 154 | Na <sup>+</sup> /K <sup>+</sup> ATPase beta 1<br>29/30,28-31<br>26/27/28,26-30<br>27,25-28   | 35.6  | 41<br>11<br>13<br>17 | 0<br>0<br>0<br>0    | Uriu T. et al. J Neurochem. 56:1548-56. (1991)   | 6978549  | 114395   | 54130    | 6753138  |          |         |         |        |
| 155 | Na <sup>+</sup> /K <sup>+</sup> ATPase beta 2<br>29/30,29-31<br>27/28/30,27-30<br>26,26-27   | 33.6  | 14<br>5<br>3<br>6    | 0<br>0<br>0<br>0    | Uriu T. et al. J Neurochem. 56:1548-56. (1991)   | 6978551  | 91127    | 4502279  | 13651387 | 2136790  | 7242138 | 2493014 | 110052 |
| 156 | Na <sup>+</sup> /K <sup>+</sup> ATPase gamma (FXD ion transport regulator 1)<br>2<br>4/5,4-5 | 10.7  | 3<br>1<br>2<br>ND    | 0<br>0<br>0<br>ND   |                                                  | 9506705  | 11612670 | 3024391  | 13928896 | 3024392  |         |         |        |
| 157 | neuronal membrane glycoprotein M6-A<br>18/19,18-20<br>18                                     | 31.9  | 7<br>ND<br>5<br>2    | 0<br>ND<br>0<br>0   |                                                  | 14149619 | 1263038  |          |          |          |         |         |        |
| 158 | neuronal membrane glycoprotein M6-B<br>20<br>17,17-21                                        | 36.9  | 4<br>1<br>ND<br>3    | 0<br>0<br>ND<br>0   |                                                  | 9502121  | 12855370 | 547882   | 12963495 |          |         |         |        |







|     |                                                               |      |                                                 |                                               |                                                                                             |  |  |  |   |
|-----|---------------------------------------------------------------|------|-------------------------------------------------|-----------------------------------------------|---------------------------------------------------------------------------------------------|--|--|--|---|
|     | <b>26</b>                                                     |      | <b>1</b>                                        | <b>0</b>                                      |                                                                                             |  |  |  |   |
| 203 | KIAA0171 (enthoprotin)<br>39/40,33-40<br>34,32-40<br>37,36-37 | 68.3 | <b>44</b><br><b>11</b><br><b>25</b><br><b>8</b> | <b>0</b><br><b>0</b><br><b>0</b><br><b>0</b>  | Wasiak S. et al. J Cell Biol. 158:855-62. (2002)<br>7661968                                 |  |  |  |   |
| 204 | KIAA1048 (AAK1)<br>47,39-47<br>46,28-47<br>44,27-44           | 93.5 | <b>62</b><br><b>7</b><br><b>19</b><br><b>36</b> | <b>0</b><br><b>0</b><br><b>0</b><br><b>0</b>  | Conner SD. & Schmid SL. J Cell Biol. 156:921-9. (2002)<br>7662462 12803719 12728973 5689433 |  |  |  |   |
| 205 | KIAA1360<br>41<br>39/40,39-40                                 | 82.5 | <b>3</b><br><b>ND</b><br><b>1</b><br><b>2</b>   | <b>0</b><br><b>ND</b><br><b>0</b><br><b>0</b> | 7243101 8922218 14042309 10436614                                                           |  |  |  |   |
| 206 | KIAA1435 (FENS1)<br>28<br>27,26-28<br>25                      | 47.3 | <b>12</b><br><b>2</b><br><b>7</b><br><b>3</b>   | <b>0</b><br><b>0</b><br><b>0</b><br><b>0</b>  | 7243268 14728270 10435345 18482373                                                          |  |  |  |   |
| 207 | NECAP 1<br>26,22-28<br>25/26,19-27<br>23,23-25                | 29.6 | <b>23</b><br><b>7</b><br><b>10</b><br><b>6</b>  | <b>0</b><br><b>0</b><br><b>0</b><br><b>0</b>  | 15079260 13385774                                                                           |  |  |  | Y |
| 208 | NECAP 2<br>18<br>18<br>17/18,17-18                            | 28.6 | <b>4</b><br><b>1</b><br><b>1</b><br><b>2</b>    | <b>0</b><br><b>0</b><br><b>0</b><br><b>0</b>  | 13384758 10435511 8922416 10440450                                                          |  |  |  | Y |
| 209 | SEC14 domain<br>21<br>20/22/23,20-23<br>22,21-23              | 40.7 | <b>12</b><br><b>1</b><br><b>3</b><br><b>8</b>   | <b>0</b><br><b>0</b><br><b>0</b><br><b>0</b>  | 12855458 20821325 13874579 13676421 18571255                                                |  |  |  |   |

The gel band number represents the band in which the peak number of peptides were identified for each protein within each preparation. The range of bands from which peptide matches were obtained is also indicated. The number of specific and shared peptides is indicated for the corresponding protein. Proteins with like lower case letters share peptides. The upper case Y indicates proteins that were validated by Western blot in Fig 3. Not detected (ND) denotes the lack of identifiable peptides in the indicated preparation. References are given for those proteins previously linked to clathrin-mediated vesicle trafficking.
