# Supplementary material
Source: PubMed Central journal article supplement (PMC374330)

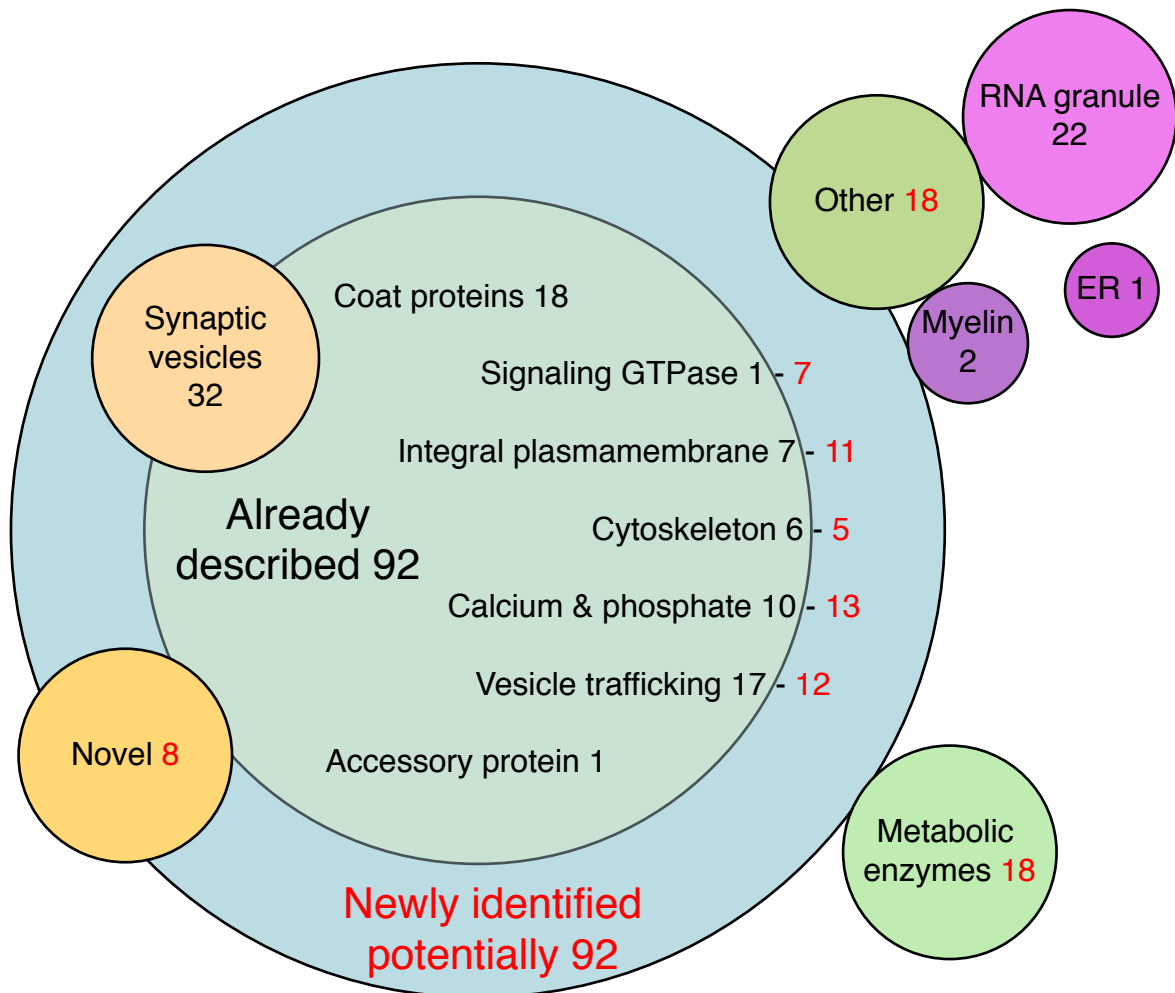

Supplement: pnas_101_11_3833__5.pdf [file pnas_101_11_3833__5.pdf]
